# Supplementary material for: Comparative Analysis of Cell Mixtures Deconvolution and Gene Signatures Generated for Blood, Immune and Cancer Cells
Source: MDPI journal article supplement (doi:10.3390/ijms241310765), 2023-06-28
Supplement: s1 [file s1]

Supp. Figure S1

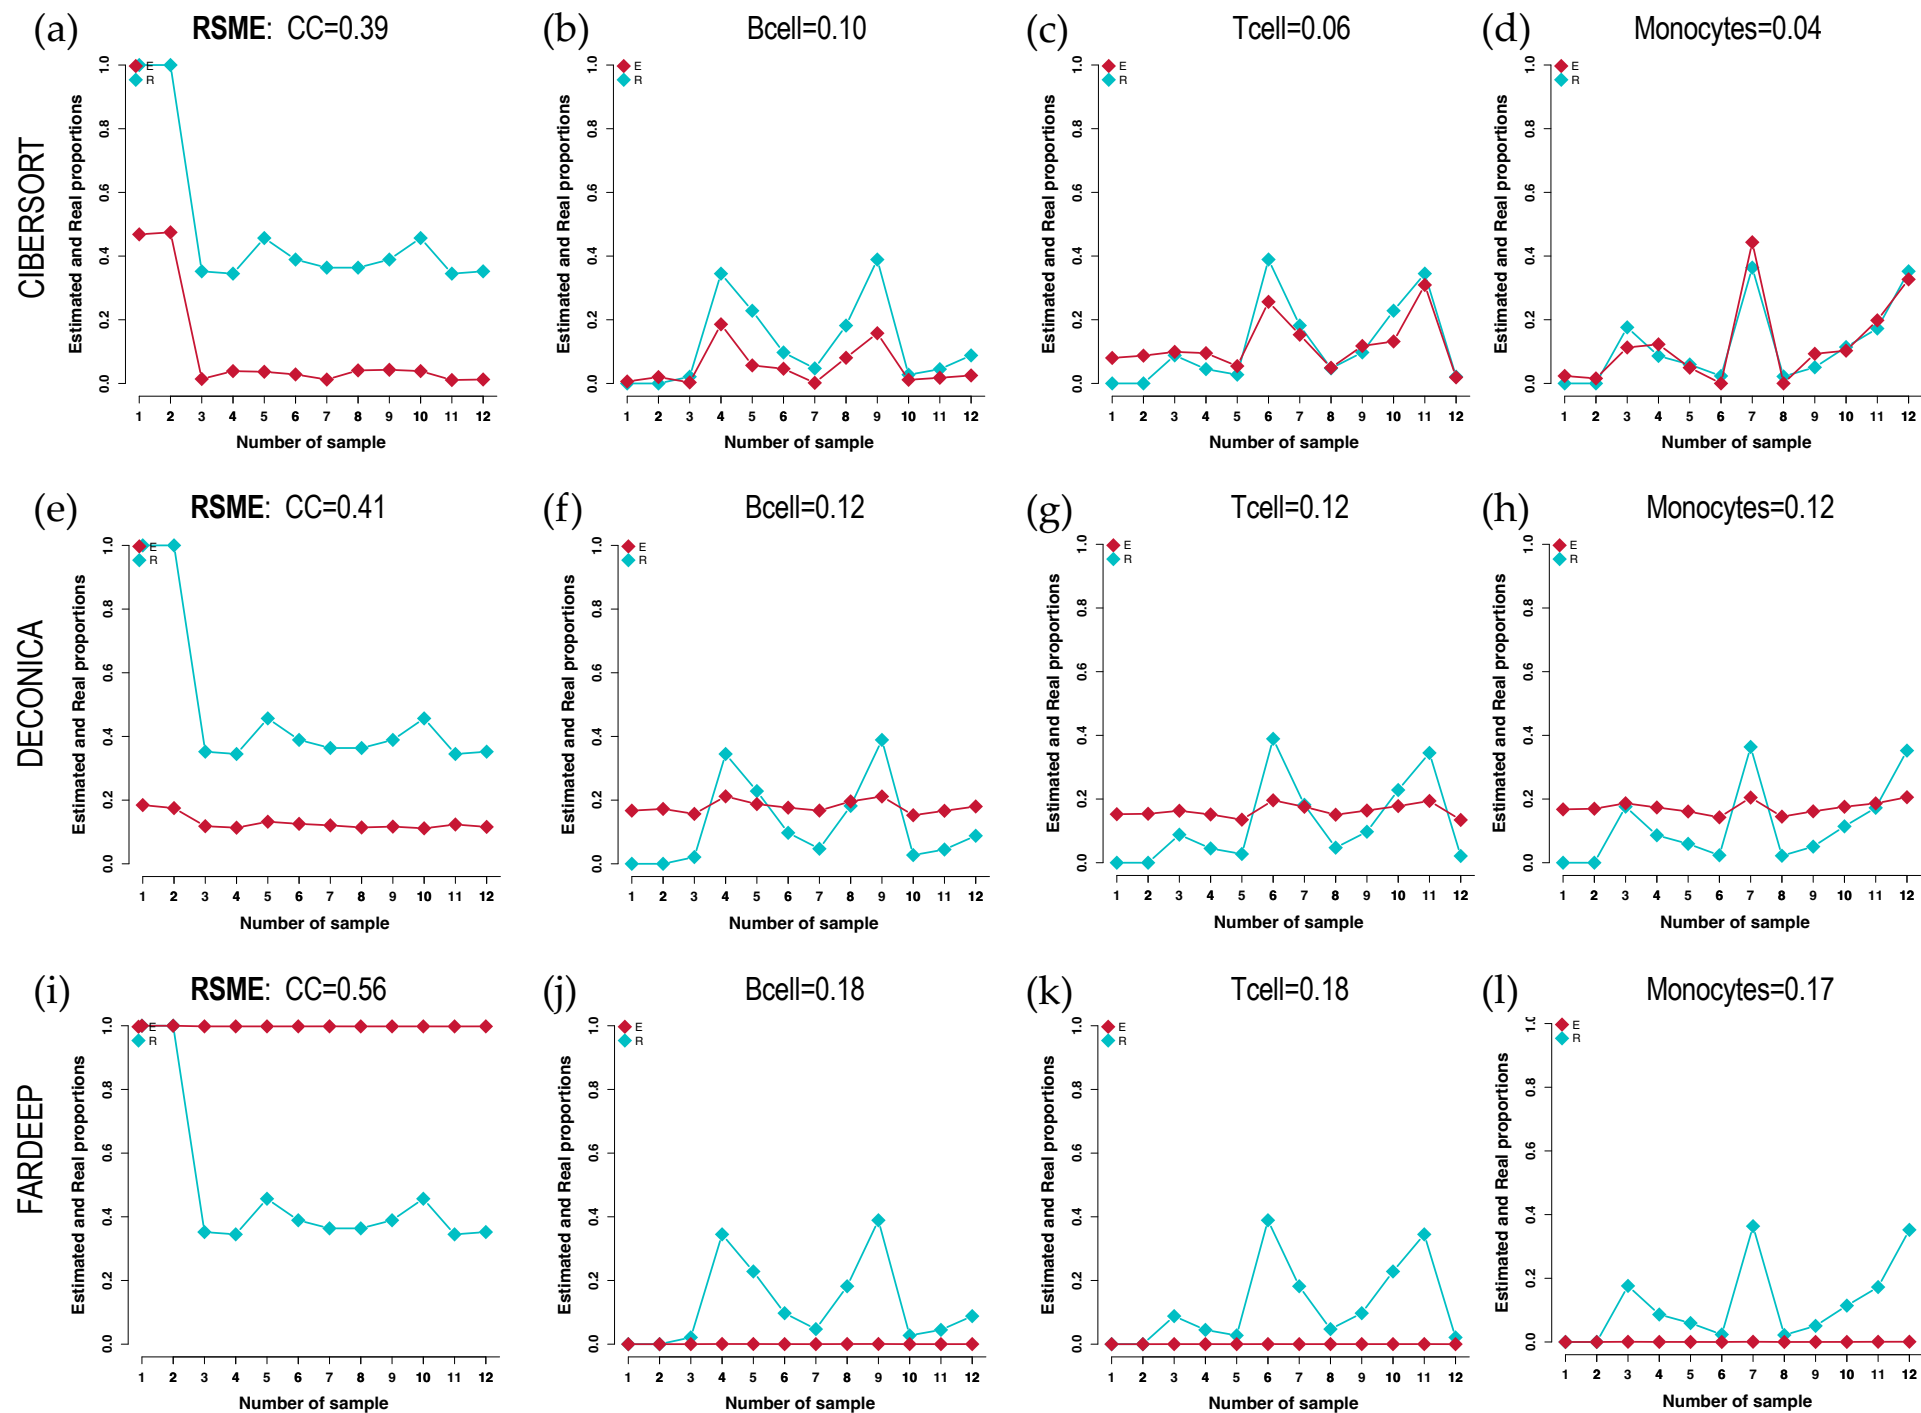

Supp. Figure S2

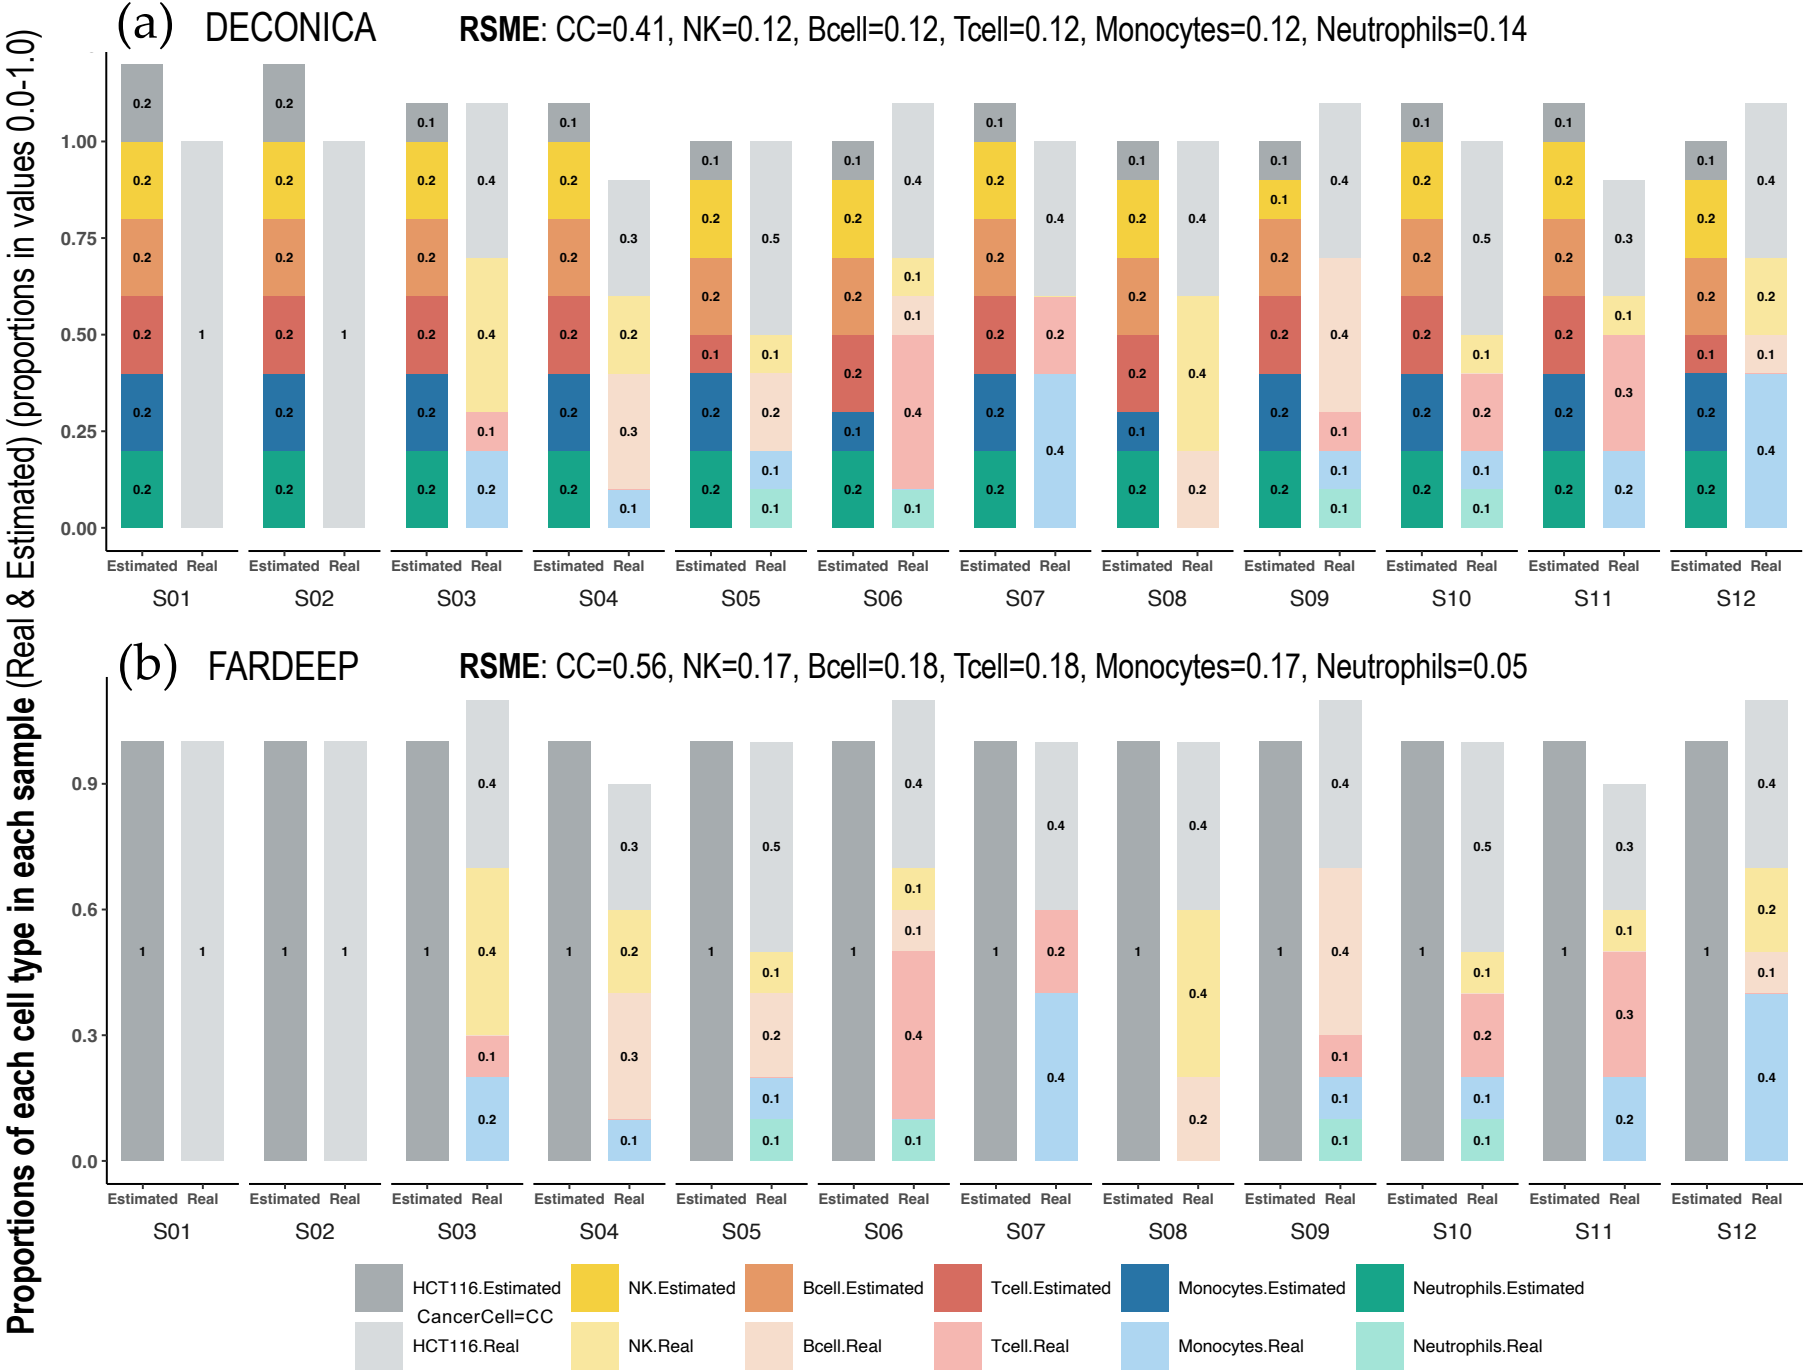

Supp. Figure S3

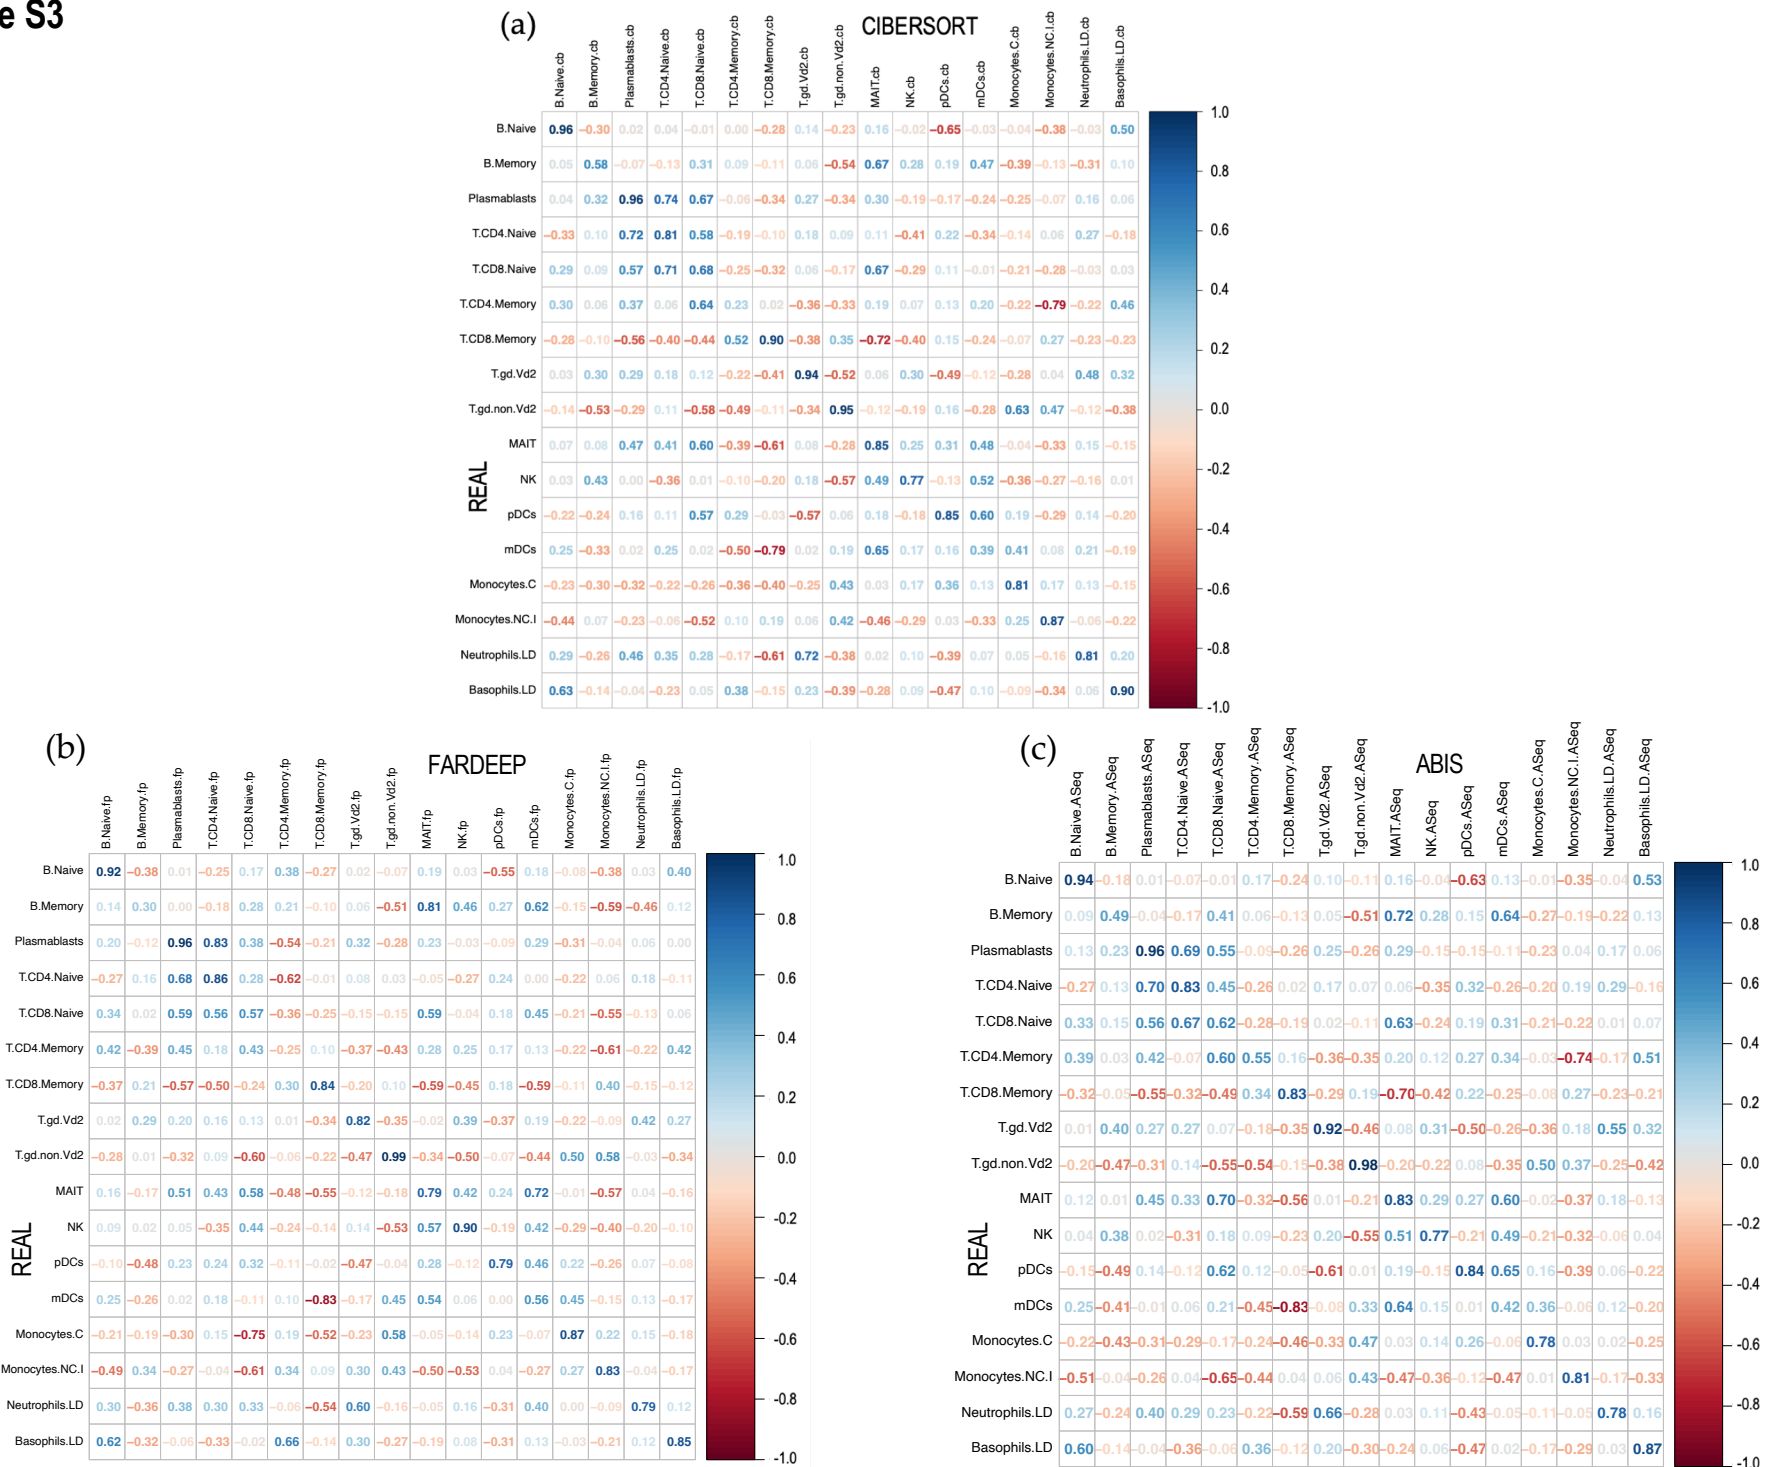

## Cell-specific gene signatures identified by LINSEED using LM22 (from CIBERSORT)

| GeneSymbol         | Bcell     | GeneSymbol         | Tcell     | GeneSymbol         | NK        | GeneSymbol         | Monocyte  | GeneSymbol         | Neutrophil |
|--------------------|-----------|--------------------|-----------|--------------------|-----------|--------------------|-----------|--------------------|------------|
| ADAM28             | 1.7295534 | ANKRD55            | 1.7327310 | APOBEC3G           | 1.7832416 | ASGR1              | 1.7682697 | AQP9               | 1.7800075  |
| BANK1              | 1.7819249 | BCL11B             | 1.7240431 | ATP8B4             | 1.7279334 | ASGR2              | 1.7879561 | BCL2A1             | 1.7650819  |
| CD19               | 1.6694348 | CD28               | 1.7535370 | CCL4               | 1.7883725 | CCR2               | 1.7826327 | C5AR1              | 1.7666271  |
| CD22               | 1.7836722 | CD3D               | 1.7369996 | CCL5               | 1.7645276 | CD1D               | 1.7592248 | C5AR2              | 1.7847974  |
| CD72               | 1.7657127 | CD3E               | 1.5805948 | CD160              | 1.7792502 | CD33               | 1.7831970 | CCR3               | 1.7773047  |
| CXCR5              | 1.7772851 | CD3G               | 1.7070489 | CD244              | 1.7400250 | CD86               | 1.7611574 | CHI3L1             | 1.7840141  |
| FCRL2              | 1.7236735 | CD40LG             | 1.7730402 | CD247              | 1.7320778 | FCN1               | 1.7814872 | CLC                | 1.7152682  |
| IGHD               | 1.7716216 | CD5                | 1.7366994 | CD7                | 1.7493547 | IL1B               | 1.7747756 | CREB5              | 1.7651106  |
| IGHM               | 1.7678175 | GPR171             | 1.7443490 | CST7               | 1.7863022 | MARCO              | 1.7594699 | CXCR1              | 1.7620472  |
| MS4A1              | 1.7733030 | ICOS               | 1.7359114 | CTSW               | 1.7850378 | MS4A6A             | 1.7860920 | CXCR2              | 1.7683026  |
| P2RX5              | 1.7674058 | IL7R               | 1.7743452 | FASLG              | 1.7744823 | RNASE2             | 1.7813298 | DAPK2              | 1.7648470  |
| PNOC               | 1.7677918 | ITK                | 1.6521469 | GNLY               | 1.7788923 | 11 genes signature |           | FCGR3B             | 1.7769466  |
| RALGPS2            | 1.7807084 | KCNA3              | 1.6767140 | GZMA               | 1.7865240 |                    |           | FPR1               | 1.7576964  |
| RASGRP3            | 1.7539484 | LEF1               | 1.7770933 | GZMB               | 1.7875933 |                    |           | FPR2               | 1.7859118  |
| SPIB               | 1.7740664 | SIRPG              | 1.7807054 | GZMH               | 1.7849737 |                    |           | HAL                | 1.7738765  |
| STAP1              | 1.6963857 | TCF7               | 1.7422185 | IL12RB2            | 1.7772257 |                    |           | HSPA6              | 1.5875779  |
| TCL1A              | 1.7828562 | TRAC               | 1.7798574 | IL2RB              | 1.7846758 |                    |           | LILRA2             | 1.7269520  |
| TMEM156            | 1.7477370 | TRAT1              | 1.7820548 | KIR2DL1            | 1.7873561 |                    |           | MGAM               | 1.7758014  |
| TNFRSF13B          | 1.7499363 | UBASH3A            | 1.7763251 | KIR2DL4            | 1.7875498 |                    |           | MMP9               | 1.7810954  |
| TNFRSF17           | 1.7423038 | 19 genes signature |           | KIR2DS4            | 1.7874721 |                    |           | MXD1               | 1.7379327  |
| VPREB3             | 1.7793013 |                    |           | KLRB1              | 1.7559382 |                    |           | NPL                | 1.6326441  |
| 21 genes signature |           |                    |           | KLRC3              | 1.7885124 |                    |           | P2RY13             | 1.5079123  |
|                    |           |                    |           | KLRC4              | 1.6855612 |                    |           | QPCT               | 1.7435342  |
|                    |           |                    |           | KLRD1              | 1.7883072 |                    |           | REPS2              | 1.7842934  |
|                    |           |                    |           | KLRF1              | 1.7841874 |                    |           | SLC12A1            | 1.7316956  |
|                    |           |                    |           | LAIR2              | 1.7832956 |                    |           | STEAP4             | 1.6856502  |
|                    |           |                    |           | NCR3               | 1.7798647 |                    |           | TNFAIP6            | 1.7785615  |
|                    |           |                    |           | NKG7               | 1.7816809 |                    |           | TREM1              | 1.7383722  |
|                    |           |                    |           | PRF1               | 1.7877407 |                    |           | TRPM6              | 1.7868189  |
|                    |           |                    |           | PRR5L              | 1.7850449 |                    |           | VNN1               | 1.5022349  |
|                    |           |                    |           | PTGDR              | 1.7836070 |                    |           | VNN2               | 1.7475986  |
|                    |           |                    |           | PTGER2             | 1.7503179 |                    |           | VNN3               | 1.7505501  |
|                    |           |                    |           | PVRIG              | 1.7437690 |                    |           | 32 genes signature |            |
|                    |           |                    |           | TBX21              | 1.7856855 |                    |           |                    |            |
|                    |           |                    |           | 34 genes signature |           |                    |           |                    |            |

Supp. Figure S5

## Hematological Cell Types &amp; Subtypes tested in each dataset

| Cell type family | Cell Types in Datasets |                |             | Cell types             |
|------------------|------------------------|----------------|-------------|------------------------|
|                  | GSE107011              | GSE106898      | GSE64385    | in LM22 (CIBERSORT)    |
|                  | 17                     | 11             | 5           | 22                     |
| Lymphocytes B    | B Naive                | B Naive        | B cells     | B Naive                |
|                  | B Memory               | B Memory       |             | B Memory               |
|                  | Plasmablasts           | Plasmablasts   |             | Plasma cells           |
| Lymphocytes T    | T CD4 Naive            | T Naive        | T cells     | T CD4 Naive            |
|                  | T CD8 Naive            |                |             | T CD8                  |
|                  | T CD8 Memory           | T Memory       |             | T CD4 Memory resting   |
|                  | T CD4 Memory           |                |             | T CD4 Memory activated |
|                  | T γδ Vd2               | –              | –           | T γδ Vd2               |
|                  | T γδ non-Vd2           | –              | –           | –                      |
|                  | MAIT                   | –              | –           | –                      |
|                  | –                      | –              | –           | T regulatory (Tregs)   |
|                  | –                      | –              | –           | T follicular helper    |
|                  | Natural Killer cells   | NK             | NK          | NK                     |
| NK activated     |                        |                |             |                        |
| Dendritic Cells  | pDCs                   | pDCs           | –           | –                      |
|                  | mDCs                   | mDCs           | –           | DCs resting            |
|                  |                        |                |             | DCs activated          |
| Monocytes        | Monocytes C            | Monocytes      | Monocytes   | Monocytes              |
|                  | Monocytes NC+I         |                |             |                        |
| Granulocytes     | Neutrophils LD         | Neutrophils LD | Neutrophils | Neutrophils            |
|                  | Basophils LD           | Basophils LD   | –           | –                      |
| Eosinophils      | –                      | –              | –           | Eosinophils            |
| Macrophages      | –                      | –              | –           | Macrophages M0         |
|                  | –                      | –              | –           | Macrophages M1         |
|                  | –                      | –              | –           | Macrophages M2         |
| Mast Cells       | –                      | –              | –           | Mast cells resting     |
|                  | –                      | –              | –           | Mast cells activated   |
